# Supplementary material for: TRPM8 Channel Activation Reduces the Spontaneous Contractions in Human Distal Colon
Source: MDPI journal article supplement (doi:10.3390/ijms21155403), 2020-07-29
Supplement: s1 [file s1]

# TRPM8 Channel Activation reduces the Spontaneous Contractions in Human Distal Colon

**Table S1.** Human colon spontaneous contraction frequency (cpm, contractions per minute) in control conditions or in the presence of the TRPM8 agonists.

|           | Control (cpm) | Agonist (cpm) | <i>p</i> Value |
|-----------|---------------|---------------|----------------|
| DAPA 2–5  | 4 ± 0.5       | 3.5 ± 1       | 0.4818         |
| DIPA 1–7  | 2.9 ± 1.3     | 3.1 ± 1.2     | 0.5975         |
| DIPA 1–8  | 3.5 ± 0.5     | 3 ± 0.5       | 0.2879         |
| DIPA 1–9  | 3.2 ± 1.1     | 3 ± 1         | 0.8272         |
| DIPA 1–10 | 3.5 ± 1       | 3.4 ± 0.9     | 0.9038         |

The DIPA agonist had no effects on frequency contractions. A probability value (*p*) of less than 0.05 was regarded as significant.

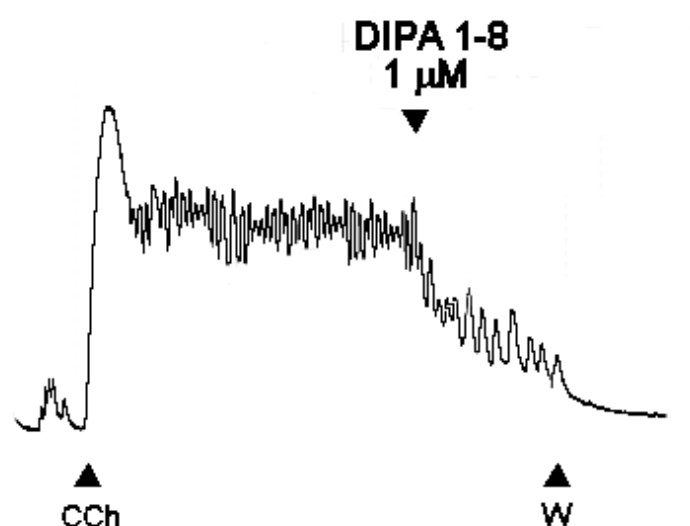

**Figure S1.** Typical tracings illustrating the response to DIPA 1–8 (1 μM) in the circular muscle strip of human colon precontracted by carbachol (CCh) (0.1 μM). W, washout. TRPM8 agonist induced a rapid relaxation.
